## CORRECTION

# Defining the three cell lineages of the human blastocyst by single-cell RNA-seq

**Paul Blakeley, Norah M. E. Fogarty, Ignacio del Valle, Sissy E. Wamaitha, Tim Xiaoming Hu, Kay Elder, Philip Snell, Leila Christie, Paul Robson and Kathy K. Niakan**

There were errors published in *Development* **142**, 3151-3165.

In the issue published online on 22 September 2015, Fig. 3 was mislabelled: panels A, B, C and D should have been B, C, D and A, respectively. In the legend, the text prior to '(A) Cytoscape enrichment map...' should not have been included. The correct version of the figure and legend now appear online and in print.

We apologise to the authors and readers for this mistake.
